# Supplementary material for: Higher Risk of Lymph Node Metastasis in Young Patients with Early Gastric Cancer
Source: PubMed Central journal article supplement (PMC6691700; doi:10.7150/jca.30260), 2019-07-23
Supplement: jcav10p4389s1.pdf [file jcav10p4389s1.pdf]

Table S1. Uni- and multivariate binary logistic regression analysis for LNM in all patients

| Parameter                   | Univariate Analysis |             |        | Multivariate Analysis |             |        |
|-----------------------------|---------------------|-------------|--------|-----------------------|-------------|--------|
|                             | Odds Ratio          | 95% CI      | P      | Odds Ratio            | 95% CI      | P      |
| Age                         |                     |             | <0.001 |                       |             | <0.001 |
| 20-39                       | Ref                 |             |        | Ref                   |             |        |
| 40-49                       | 0.85                | 0.71 1.02   | 0.081  | 0.92                  | 0.75 1.13   | 0.435  |
| 50-59                       | 0.80                | 0.67 0.95   | 0.009  | 0.91                  | 0.75 1.11   | 0.349  |
| 60-69                       | 0.71                | 0.60 0.83   | <0.001 | 0.87                  | 0.72 1.05   | 0.146  |
| 70-79                       | 0.60                | 0.51 0.70   | <0.001 | 0.76                  | 0.63 0.91   | 0.003  |
| 80+                         | 0.55                | 0.46 0.64   | <0.001 | 0.70                  | 0.58 0.85   | <0.001 |
| Sex                         |                     |             |        |                       |             |        |
| Female                      | Ref                 |             |        | Ref                   |             |        |
| Male                        | 1.06                | 1.00 1.12   | 0.039  | 1.03                  | 0.97 1.09   | 0.384  |
| Race                        |                     |             | <0.001 |                       |             | 0.026  |
| Black                       | Ref                 |             |        | Ref                   |             |        |
| White                       | 0.95                | 0.88 1.02   | 0.176  | 0.89                  | 0.81 0.97   | 0.008  |
| Other                       | 0.85                | 0.78 0.93   | <0.001 | 0.93                  | 0.84 1.09   | 0.135  |
| Surgery type                |                     |             | <0.001 |                       |             | 0.001  |
| Partial gastrectomy         | Ref                 |             |        | Ref                   |             |        |
| Near total/total gastrctomy | 1.70                | 1.57 1.82   | <0.001 | 1.13                  | 1.04 1.24   | 0.004  |
| Gastrctomy NOS              | 1.60                | 1.25 2.03   | <0.001 | 1.17                  | 0.89 1.54   | 0.273  |
| Combined resection          | 2.02                | 1.85 2.20   | <0.001 | 1.18                  | 1.07 1.31   | 0.001  |
| Tumor size                  |                     |             | <0.001 |                       |             | <0.001 |
| ≤45mm                       | Ref                 |             |        | Ref                   |             |        |
| >45mm                       | 3.06                | 2.89 3.25   | <0.001 | 1.43                  | 1.34 1.54   | <0.001 |
| Unknown                     | 1.23                | 1.13 1.33   | <0.001 | 1.05                  | 0.95 1.16   | 0.308  |
| Histological type           |                     |             |        |                       |             |        |
| Intestinal                  | Ref                 |             |        | Ref                   |             |        |
| Diffuse                     | 1.74                | 1.56 1.93   | <0.001 | 1.26                  | 1.11 1.42   | <0.001 |
| T stage                     |                     |             | <0.001 |                       |             | <0.001 |
| T1                          | Ref                 |             |        | Ref                   |             |        |
| T2                          | 3.40                | 3.06 3.76   | <0.001 | 3.20                  | 2.88 3.56   | <0.001 |
| T3                          | 10.32               | 9.48 11.25  | <0.001 | 8.83                  | 8.10 9.66   | <0.001 |
| T4                          | 18.30               | 16.67 20.10 | <0.001 | 14.89                 | 13.48 16.44 | <0.001 |
| Number of ELNs              |                     |             |        |                       |             |        |
| ≤15                         | Ref                 |             |        | Ref                   |             |        |
| >15                         | 1.89                | 1.78 2.00   | <0.001 | 1.67                  | 1.57 1.79   | <0.001 |

**Abbreviations:** NOS, not otherwise specified; Ref, reference; CI, confidence interval

Table S2. Uni- and multivariate binary logistic regression analysis for LNM in T1 patients

| Parameter                   | Univariate Analysis |      |        |        | Multivariate Analysis |            |      |        |  |        |        |
|-----------------------------|---------------------|------|--------|--------|-----------------------|------------|------|--------|--|--------|--------|
|                             | Odds Ratio          |      | 95% CI |        | P                     | Odds Ratio |      | 95% CI |  | P      |        |
| Age                         |                     |      |        |        |                       |            |      |        |  | 0.016  | 0.031  |
| 20-39                       | Ref                 |      |        |        | Ref                   |            |      |        |  |        |        |
| 40-49                       | 0.81                | 0.50 | 1.32   | 0.398  | 0.74                  | 0.45       | 1.23 | 0.247  |  |        |        |
| 50-59                       | 0.76                | 0.48 | 1.19   | 0.230  | 0.77                  | 0.48       | 1.22 | 0.259  |  |        |        |
| 60-69                       | 0.73                | 0.47 | 1.14   | 0.165  | 0.72                  | 0.46       | 1.13 | 0.153  |  |        |        |
| 70-79                       | 0.59                | 0.38 | 0.92   | 0.019  | 0.59                  | 0.38       | 0.93 | 0.022  |  |        |        |
| 80+                         | 0.60                | 0.38 | 0.94   | 0.026  | 0.59                  | 0.37       | 0.93 | 0.023  |  |        |        |
| Sex                         |                     |      |        |        |                       |            |      |        |  |        |        |
| Female                      | Ref                 |      |        |        | Ref                   |            |      |        |  |        |        |
| Male                        | 0.87                | 0.75 | 1.00   | 0.053  |                       |            |      |        |  |        |        |
| Race                        |                     |      |        |        |                       |            |      |        |  | 0.034  | 0.018  |
| Black                       | Ref                 |      |        |        | Ref                   |            |      |        |  |        |        |
| White                       | 0.89                | 0.73 | 1.09   | 0.264  | 0.91                  | 0.74       | 1.13 | 0.397  |  |        |        |
| Other                       | 0.76                | 0.61 | 0.95   | 0.014  | 0.75                  | 0.60       | 0.94 | 0.012  |  |        |        |
| Surgery type                |                     |      |        |        |                       |            |      |        |  | 0.095  |        |
| Partial gastrectomy         | Ref                 |      |        |        |                       |            |      |        |  |        |        |
| Near total/total gastrctomy | 1.12                | 0.91 | 1.39   | 0.285  |                       |            |      |        |  |        |        |
| Gastrctomy NOS              | 1.98                | 1.05 | 3.76   | 0.036  |                       |            |      |        |  |        |        |
| Combined resection          | 1.18                | 0.90 | 1.56   | 0.239  |                       |            |      |        |  |        |        |
| Tumor size                  |                     |      |        |        |                       |            |      |        |  | <0.001 | <0.001 |
| ≤45mm                       | Ref                 |      |        |        | Ref                   |            |      |        |  |        |        |
| >45mm                       | 2.81                | 2.32 | 3.42   | <0.001 | 2.74                  | 2.25       | 3.34 | <0.001 |  |        |        |
| Unknown                     | 0.69                | 0.56 | 0.85   | <0.001 | 0.71                  | 0.57       | 0.87 | 0.001  |  |        |        |
| Histological type           |                     |      |        |        |                       |            |      |        |  |        |        |
| Intestinal                  | Ref                 |      |        |        | Ref                   |            |      |        |  |        |        |
| Diffuse                     | 1.44                | 1.08 | 1.94   | 0.015  | 1.29                  | 0.95       | 1.76 | 0.101  |  |        |        |
| Number of ELNs              |                     |      |        |        |                       |            |      |        |  |        |        |
| ≤15                         | Ref                 |      |        |        | Ref                   |            |      |        |  |        |        |
| >15                         | 1.64                | 1.42 | 1.90   | <0.001 | 1.50                  | 1.29       | 1.75 | <0.001 |  |        |        |

**Abbreviations:** NOS, not otherwise specified; Ref, reference; CI, confidence interval

Table S3. Uni- and multivariate binary logistic regression analysis for LNM in T2 patients

| Parameter                   | Univariate Analysis |           |        | Multivariate Analysis |           |        |
|-----------------------------|---------------------|-----------|--------|-----------------------|-----------|--------|
|                             | Odds Ratio          | 95%CI     | P      | Odds Ratio            | 95%CI     | P      |
| Age                         |                     |           | 0.016  |                       |           | 0.100  |
| 20-39                       | Ref                 |           |        | Ref                   |           |        |
| 40-49                       | 0.83                | 0.49 1.41 | 0.499  | 0.83                  | 0.49 1.41 | 0.488  |
| 50-59                       | 0.88                | 0.54 1.44 | 0.617  | 0.85                  | 0.52 1.40 | 0.524  |
| 60-69                       | 0.66                | 0.41 1.06 | 0.088  | 0.66                  | 0.41 1.07 | 0.093  |
| 70-79                       | 0.62                | 0.39 1.00 | 0.049  | 0.65                  | 0.40 1.04 | 0.073  |
| 80+                         | 0.63                | 0.39 1.01 | 0.054  | 0.67                  | 0.41 1.08 | 0.098  |
| Sex                         |                     |           |        |                       |           |        |
| Female                      | Ref                 |           |        |                       |           |        |
| Male                        | 0.89                | 0.76 1.04 | 0.131  |                       |           |        |
| Race                        |                     |           | 0.087  |                       |           |        |
| Black                       | Ref                 |           |        |                       |           |        |
| White                       | 0.86                | 0.70 1.07 | 0.179  |                       |           |        |
| Other                       | 0.77                | 0.60 0.97 | 0.028  |                       |           |        |
| Surgery type                |                     |           | 0.663  |                       |           |        |
| Partial gastrectomy         | Ref                 |           |        |                       |           |        |
| Near total/total gastrctomy | 1.00                | 0.80 1.24 | 0.972  |                       |           |        |
| Gastrctomy NOS              | 1.32                | 0.62 2.83 | 0.470  |                       |           |        |
| Combined resection          | 1.16                | 0.88 1.52 | 0.299  |                       |           |        |
| Tumor size                  |                     |           | 0.001  |                       |           | 0.004  |
| ≤45mm                       | Ref                 |           |        | Ref                   |           |        |
| >45mm                       | 1.36                | 1.15 1.61 | <0.001 | 1.32                  | 1.11 1.57 | 0.001  |
| Unknown                     | 0.96                | 0.73 1.26 | 0.769  | 0.97                  | 0.74 1.27 | 0.815  |
| Histological type           |                     |           |        |                       |           |        |
| Intestinal                  | Ref                 |           |        |                       |           |        |
| Diffuse                     | 1.14                | 0.81 1.59 | 0.449  |                       |           |        |
| Number of ELNs              |                     |           |        |                       |           |        |
| ≤15                         | Ref                 |           |        | Ref                   |           |        |
| >15                         | 1.69                | 1.44 1.98 | <0.001 | 1.62                  | 1.38 1.90 | <0.001 |

**Abbreviations:** NOS, not otherwise specified; Ref, reference; CI, confidence interval

Table S4. Uni- and multivariate binary logistic regression analysis for LNM in T3 patients

| Parameter                   | Univariate Analysis |        |      | Multivariate Analysis |            |        |      |        |
|-----------------------------|---------------------|--------|------|-----------------------|------------|--------|------|--------|
|                             | Odds Ratio          | 95% CI |      | P                     | Odds Ratio | 95% CI |      | P      |
| Age                         |                     |        |      | 0.023                 |            |        |      | 0.138  |
| 20-39                       | Ref                 |        |      |                       | Ref        |        |      |        |
| 40-49                       | 0.99                | 0.72   | 1.38 | 0.961                 | 1.00       | 0.72   | 1.40 | 0.984  |
| 50-59                       | 1.05                | 0.77   | 1.43 | 0.757                 | 1.04       | 0.76   | 1.42 | 0.798  |
| 60-69                       | 0.96                | 0.72   | 1.30 | 0.808                 | 1.01       | 0.75   | 1.36 | 0.960  |
| 70-79                       | 0.77                | 0.57   | 1.02 | 0.072                 | 0.83       | 0.62   | 1.12 | 0.217  |
| 80+                         | 0.61                | 0.45   | 0.82 | 0.001                 | 0.71       | 0.52   | 0.96 | 0.025  |
| Sex                         |                     |        |      |                       |            |        |      |        |
| Female                      | Ref                 |        |      |                       | Ref        |        |      |        |
| Male                        | 1.14                | 1.03   | 1.25 | 0.010                 | 1.11       | 1.00   | 1.22 | 0.043  |
| Race                        |                     |        |      | <0.001                |            |        |      | <0.001 |
| Black                       | Ref                 |        |      |                       | Ref        |        |      |        |
| White                       | 0.83                | 0.72   | 0.95 | 0.008                 | 0.87       | 0.76   | 1.00 | 0.053  |
| Other                       | 1.15                | 0.98   | 1.36 | 0.082                 | 1.14       | 0.96   | 1.34 | 0.128  |
| Surgery type                |                     |        |      | <0.001                |            |        |      | <0.001 |
| Partial gastrectomy         | Ref                 |        |      |                       | Ref        |        |      |        |
| Near total/total gastrctomy | 1.42                | 1.25   | 1.62 | <0.001                | 1.22       | 1.07   | 1.39 | 0.003  |
| Gastrctomy NOS              | 1.17                | 0.79   | 1.74 | 0.423                 | 1.12       | 0.75   | 1.67 | 0.574  |
| Combined resection          | 1.55                | 1.32   | 1.83 | <0.001                | 1.39       | 1.18   | 1.65 | <0.001 |
| Tumor size                  |                     |        |      | <0.001                |            |        |      | <0.001 |
| ≤45mm                       | Ref                 |        |      |                       | Ref        |        |      |        |
| >45mm                       | 1.43                | 1.29   | 1.58 | <0.001                | 1.35       | 1.22   | 1.50 | <0.001 |
| Unknown                     | 1.24                | 1.05   | 1.47 | 0.011                 | 1.24       | 1.04   | 1.47 | 0.016  |
| Histological type           |                     |        |      |                       |            |        |      |        |
| Intestinal                  | Ref                 |        |      |                       | Ref        |        |      |        |
| Diffuse                     | 1.39                | 1.15   | 1.70 | 0.001                 | 1.24       | 1.02   | 1.52 | 0.034  |
| Number of ELNs              |                     |        |      |                       |            |        |      |        |
| ≤15                         | Ref                 |        |      |                       | Ref        |        |      |        |
| >15                         | 1.67                | 1.51   | 1.85 | <0.001                | 1.49       | 1.34   | 1.65 | <0.001 |

**Abbreviations:** NOS, not otherwise specified; Ref, reference; CI, confidence interval

Table S5. Uni- and multivariate binary logistic regression analysis for LNM in T4 patients

| Parameter                   | Univariate Analysis |        |      |        | Multivariate Analysis |        |      |        |
|-----------------------------|---------------------|--------|------|--------|-----------------------|--------|------|--------|
|                             | Odds Ratio          | 95% CI |      | P      | Odds Ratio            | 95% CI |      | P      |
| Age                         |                     |        |      | 0.001  |                       |        |      | 0.376  |
| 20-39                       | Ref                 |        |      |        | Ref                   |        |      |        |
| 40-49                       | 1.00                | 0.69   | 1.47 | 0.988  | 1.00                  | 0.68   | 1.47 | 0.991  |
| 50-59                       | 0.88                | 0.62   | 1.25 | 0.469  | 0.89                  | 0.63   | 1.27 | 0.523  |
| 60-69                       | 0.89                | 0.64   | 1.25 | 0.505  | 0.94                  | 0.67   | 1.32 | 0.710  |
| 70-79                       | 0.76                | 0.55   | 1.06 | 0.105  | 0.85                  | 0.61   | 1.19 | 0.353  |
| 80+                         | 0.65                | 0.46   | 0.91 | 0.013  | 0.79                  | 0.56   | 1.12 | 0.184  |
| Sex                         |                     |        |      |        |                       |        |      |        |
| Female                      | Ref                 |        |      |        | Ref                   |        |      |        |
| Male                        | 1.13                | 1.00   | 1.28 | 0.051  |                       |        |      |        |
| Race                        |                     |        |      | 0.028  |                       |        |      | 0.105  |
| Black                       | Ref                 |        |      |        | Ref                   |        |      |        |
| White                       | 0.88                | 0.73   | 1.05 | 0.159  | 0.85                  | 0.71   | 1.03 | 0.093  |
| Other                       | 1.06                | 0.87   | 1.31 | 0.559  | 0.97                  | 0.79   | 1.20 | 0.778  |
| Surgery type                |                     |        |      | <0.001 |                       |        |      | 0.087  |
| Partial gastrectomy         | Ref                 |        |      |        | Ref                   |        |      |        |
| Near total/total gastrctomy | 1.53                | 1.30   | 1.81 | <0.001 | 1.24                  | 1.04   | 1.47 | 0.016  |
| Gastrctomy NOS              | 1.01                | 0.62   | 1.66 | 0.968  | 0.85                  | 0.51   | 1.41 | 0.531  |
| Combined resection          | 1.29                | 1.10   | 1.52 | 0.002  | 1.08                  | 0.91   | 1.27 | 0.373  |
| Tumor size                  |                     |        |      | <0.001 |                       |        |      | <0.001 |
| ≤45mm                       | Ref                 |        |      |        | Ref                   |        |      |        |
| >45mm                       | 1.49                | 1.30   | 1.71 | <0.001 | 1.40                  | 1.22   | 1.61 | <0.001 |
| Unknown                     | 1.34                | 1.10   | 1.64 |        | 1.31                  | 1.06   | 1.61 | 0.011  |
| Histological type           |                     |        |      |        |                       |        |      |        |
| Intestinal                  | Ref                 |        |      |        | Ref                   |        |      |        |
| Diffuse                     | 1.51                | 1.22   | 1.88 | <0.001 | 1.32                  | 1.05   | 1.64 | 0.015  |
| Number of ELNs              |                     |        |      |        |                       |        |      |        |
| ≤15                         | Ref                 |        |      |        | Ref                   |        |      |        |
| >15                         | 2.35                | 2.05   | 2.69 | <0.001 | 2.20                  | 1.91   | 2.52 | <0.001 |

**Abbreviations:** NOS, not otherwise specified; Ref, reference; CI, confidence interval

Table S6. Uni- and multivariate binary logistic regression analysis for LNM in all patients with ELNs > 15

| Parameter                    | Univariate Analysis |             |        | Multivariate Analysis |             |        |
|------------------------------|---------------------|-------------|--------|-----------------------|-------------|--------|
|                              | Odds Ratio          | 95%CI       | P      | Odds Ratio            | 95%CI       | P      |
| Age                          |                     |             | 0.001  |                       |             | 0.063  |
| 20-39                        | Ref                 |             |        | Ref                   |             |        |
| 40-49                        | 0.73                | 0.55 0.98   | 0.037  | 0.82                  | 0.59 1.14   | 0.236  |
| 50-59                        | 0.75                | 0.57 0.98   | 0.036  | 0.88                  | 0.64 1.20   | 0.407  |
| 60-69                        | 0.67                | 0.52 0.88   | 0.004  | 0.84                  | 0.62 1.14   | 0.269  |
| 70-79                        | 0.64                | 0.49 0.84   | 0.001  | 0.79                  | 0.58 1.06   | 0.117  |
| 80+                          | 0.59                | 0.45 0.78   | <0.001 | 0.68                  | 0.50 0.94   | 0.018  |
| Sex                          |                     |             |        |                       |             |        |
| Female                       | Ref                 |             |        |                       |             |        |
| Male                         | 1.04                | 0.95 1.14   | 0.450  |                       |             |        |
| Race                         |                     |             | 0.001  |                       |             | 0.580  |
| Black                        | Ref                 |             |        | Ref                   |             |        |
| White                        | 1.04                | 0.91 1.19   | 0.550  | 0.95                  | 0.82 1.12   | 0.583  |
| Other                        | 0.86                | 0.76 1.00   | 0.045  | 1.02                  | 0.86 1.21   | 0.842  |
| Surgery type                 |                     |             | <0.001 |                       |             | 0.185  |
| Partial gastrectomy          | Ref                 |             |        | Ref                   |             |        |
| Near total/total gastrectomy | 1.49                | 1.33 1.67   | <0.001 | 1.08                  | 0.95 1.23   | 0.266  |
| Gastrectomy NOS              | 1.39                | 0.91 2.11   | 0.124  | 0.89                  | 0.56 1.43   | 0.636  |
| Combined resection           | 1.99                | 1.73 2.30   | <0.001 | 1.18                  | 1.00 1.39   | 0.046  |
| Tumor size                   |                     |             | <0.001 |                       |             | <0.001 |
| ≤45mm                        | Ref                 |             |        | Ref                   |             |        |
| >45mm                        | 2.93                | 2.65 3.24   | <0.001 | 1.36                  | 1.20 1.53   | <0.001 |
| Unknown                      | 1.49                | 1.27 1.74   | <0.001 | 1.03                  | 0.86 1.24   | 0.756  |
| Histological type            |                     |             |        |                       |             |        |
| Intestinal                   | Ref                 |             |        | Ref                   |             |        |
| Diffuse                      | 1.56                | 1.32 1.84   | <0.001 | 1.32                  | 1.08 1.60   | 0.006  |
| T stage                      |                     |             | <0.001 |                       |             | <0.001 |
| T1                           | Ref                 |             |        | Ref                   |             |        |
| T2                           | 3.43                | 2.89 4.07   | <0.001 | 3.27                  | 2.74 3.90   | <0.001 |
| T3                           | 10.23               | 8.87 11.80  | <0.001 | 9.05                  | 7.79 10.51  | <0.001 |
| T4                           | 23.00               | 19.52 27.09 | <0.001 | 19.40                 | 16.31 23.10 | <0.001 |

**Abbreviations:** NOS, not otherwise specified; Ref, reference; CI, confidence interval
